# Supplementary material
Source: PubMed Central journal article supplement (PMC6519023)
Supplement: MMI-111-1382-s001.pdf [file MMI-111-1382-s001.pdf]

# **DksA-RNA polymerase interactions support new origin formation and DNA repair in *Escherichia coli***

Kamila K. Myka, Kira Küsters, Robert Washburn and Max E. Gottesman

## **SUPPLEMENTARY INFORMATION**

- Supplementary experimental procedures
- Figures S1-S4
- Tables S1-S4
- Supplementary references

### **SUPPLEMENTARY EXPERIMENTAL PROCEDURES**

#### ***Confirmation of $\Delta relA$ and $ppGpp^0$ phenotypes***

Strains used for viability assays were also tested on M9 minimal agar with glucose with or without 1.6 mg ml<sup>-1</sup> casamino acids or 1.6 µg ml<sup>-1</sup> serine, methionine, glycine each (Ser-Met-Gly). 10 µl of a 10-fold dilution was spread on a section of a plate and incubated at 32°C if strains contained the *dnaA46<sup>ts</sup>* mutation or 37°C for all other strains. Photographs were taken after 24h incubation.  $\Delta relA$  strains display impaired growth on minimal agar with Ser-Met-Gly as compared with minimal agar without amino acids.  $\Delta relA \Delta spoT$  strains do not grow without casamino acids.

#### ***Phleomycin viability assay***

*E. coli* strains were grown for 18 h at 37°C with shaking in LB broth. The cultures were then serially diluted ten-fold in M9 salts. 5 µl aliquots were spotted on LB agar plates with and without 1 µg ml<sup>-1</sup> phleomycin and the plates were incubated at 37°C. Experiments were performed at least twice; representative datasets are shown.

## Figure S1

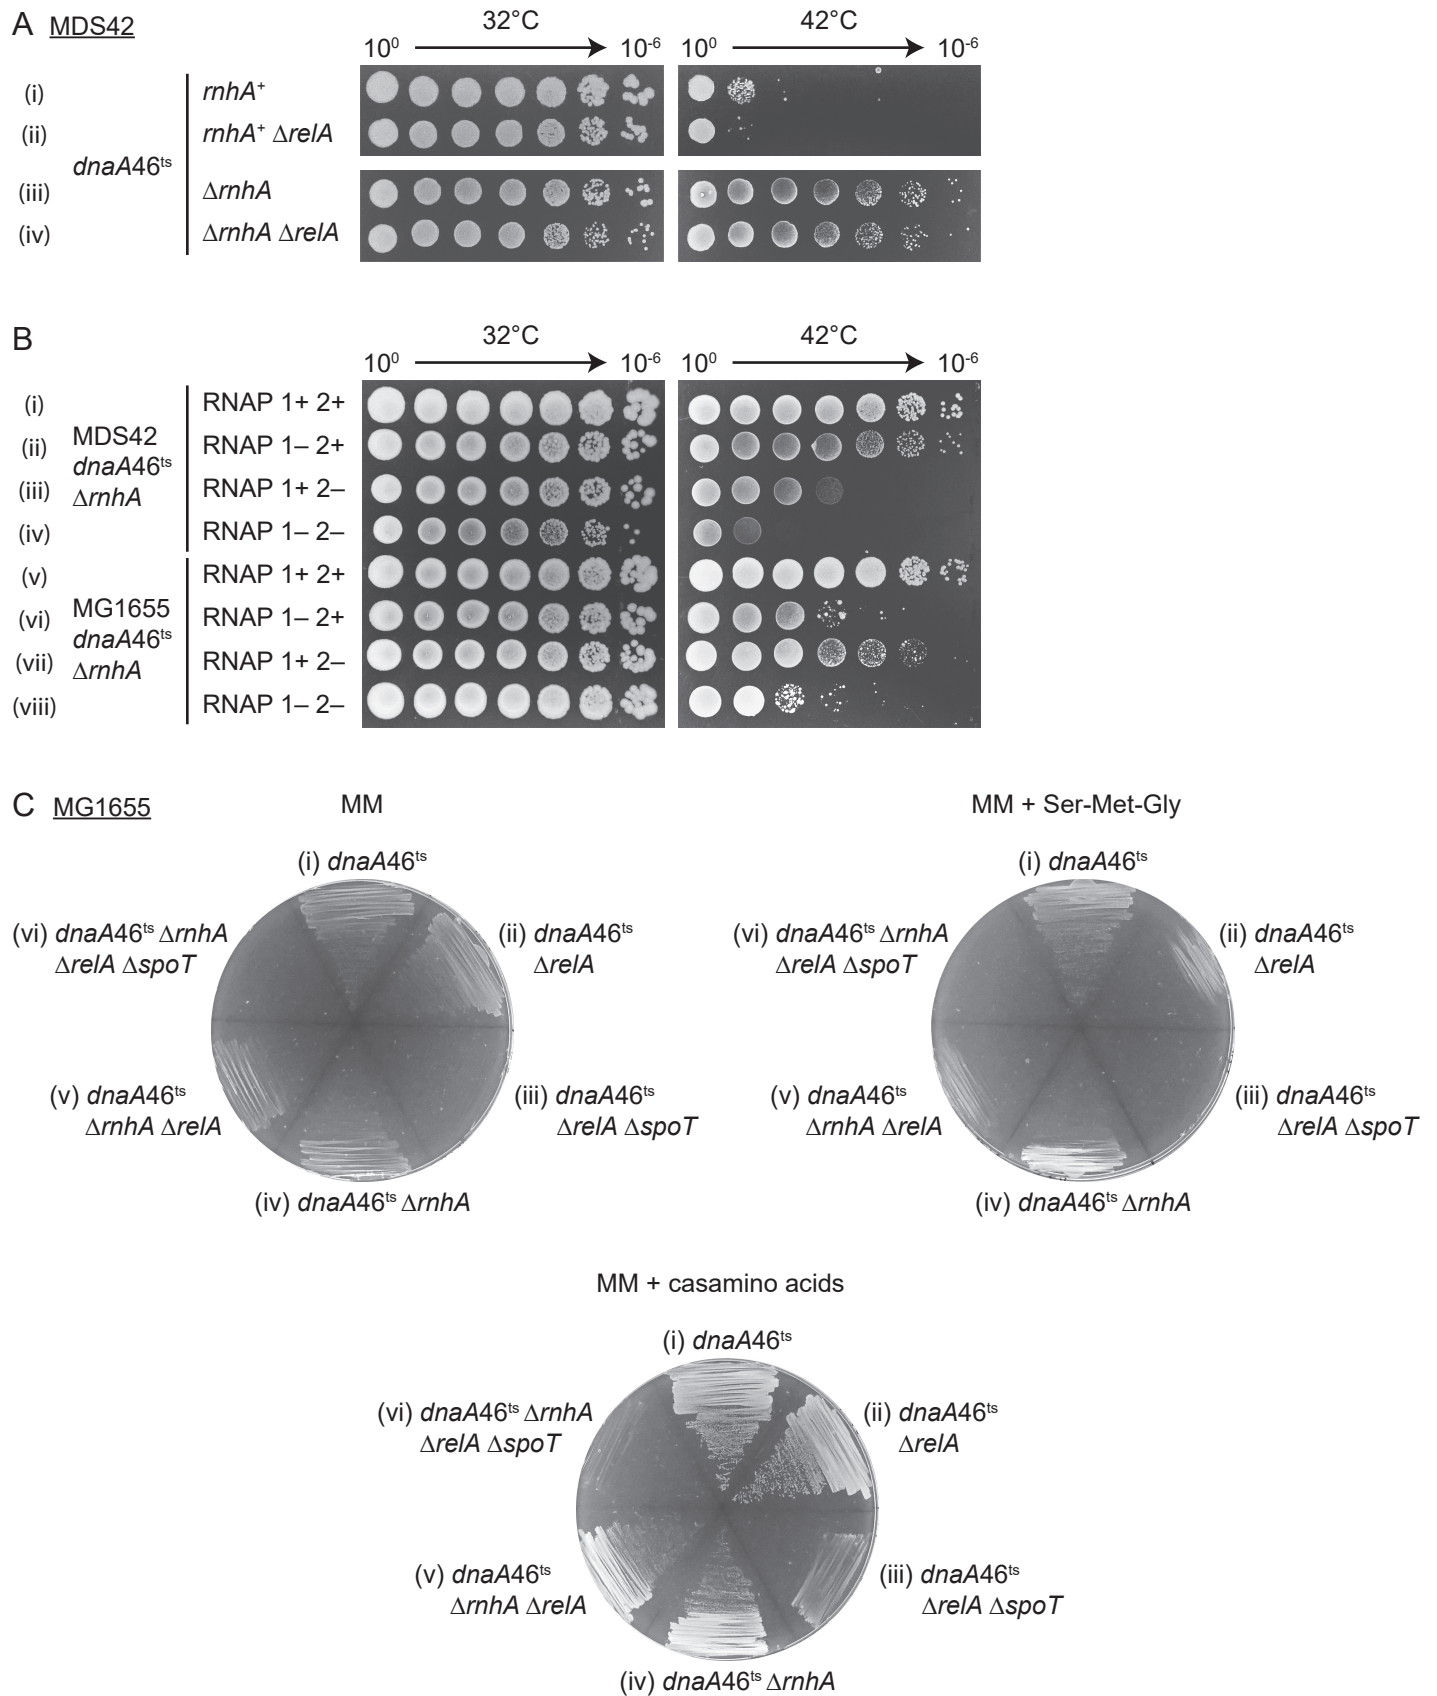

**Fig. S1. The importance of (p)ppGpp for cSDR.** Corresponds to Fig. 4. (A) Deletion of the gene encoding the major (p)ppGpp synthase, RelA, did not inhibit *oriC*-independent replication. Strains (i-iv): 10583, KM699, KM554, KM705. (B) RNAP (p)ppGpp binding site 2 plays a major role in cSDR in the MDS42 but not in the MG1655 background. cSDR is more impaired in RNAP (p)ppGpp binding site 1 mutants in MG1655-derived strains (i-viii): KK07B, KM901, KK09A, KM913, KM1120, KM1153, KM1165, KM1155. (C) Confirmation of  $\Delta$ *relA* and ppGpp<sup>0</sup> phenotypes. Strains used are the same as in Fig. 4B (i-vi): KM712, KM1136, KM1137, KM1171, KM1173, KM1236.

**Figure S2**

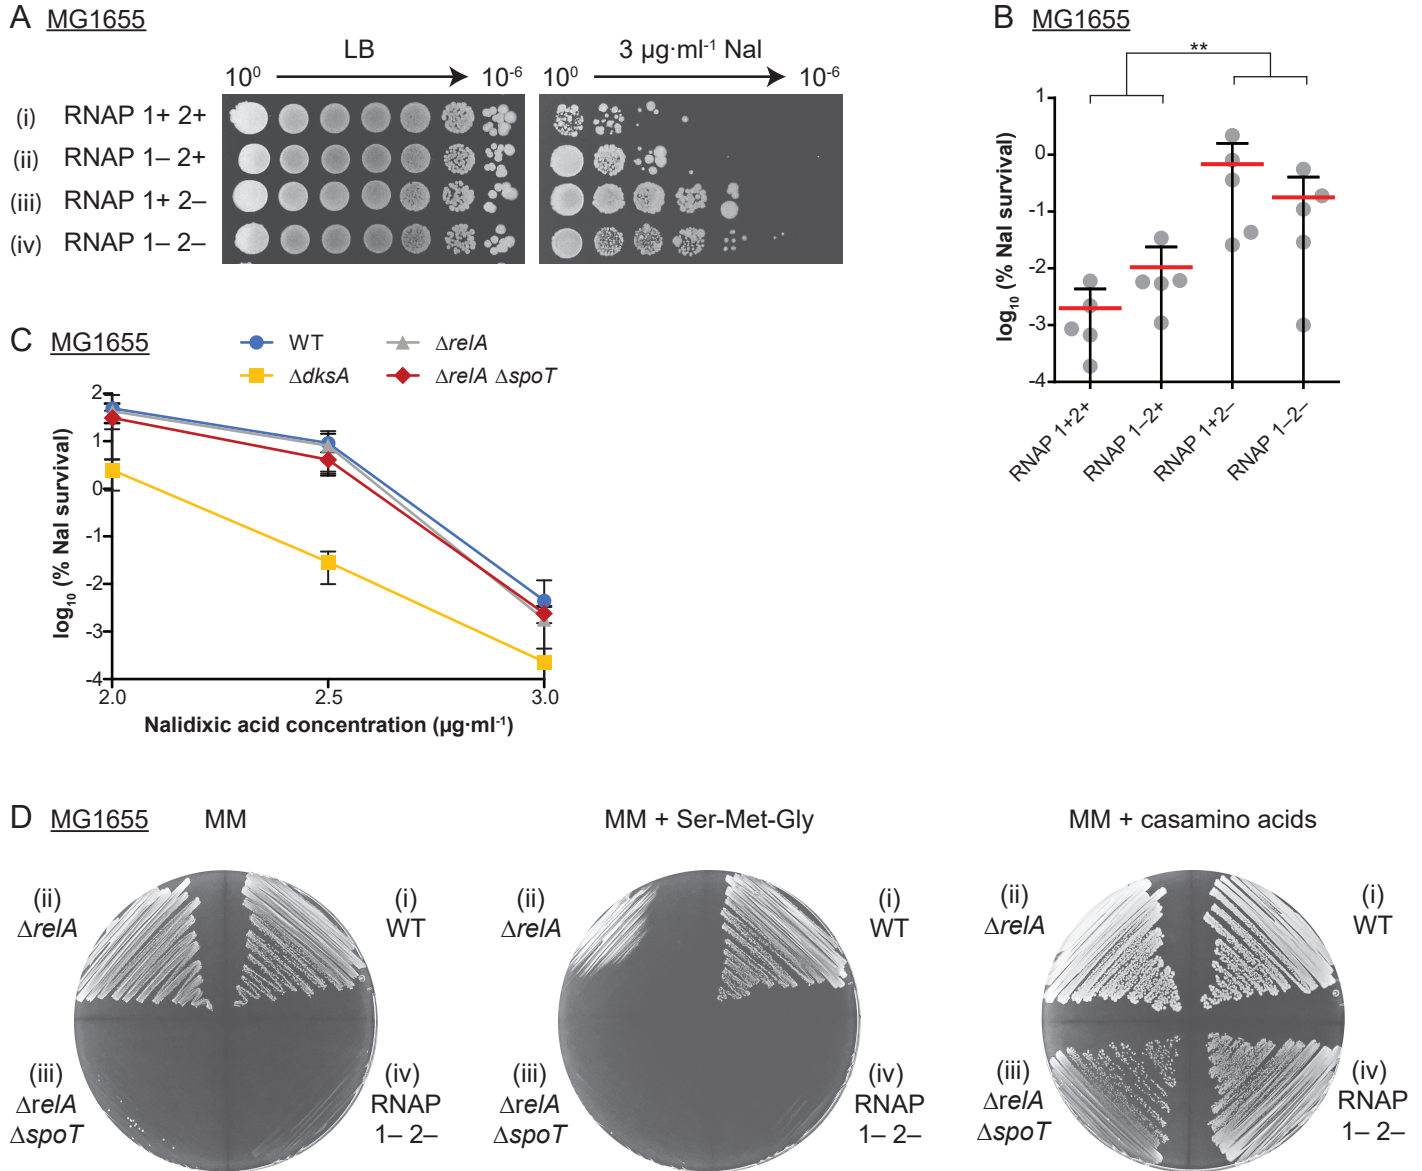

**Fig. S2. RNAP (p)ppGpp-binding site 2 mutation enhances resistance to nalidixic acid.** Corresponds to Fig. 5. (A) The RNAP site 1 mutation did not affect growth on Nal whereas the RNAP site 2 mutant was more resistant than wild-type. The Nal concentration used was  $3 \mu\text{g ml}^{-1}$  instead of  $4 \mu\text{g ml}^{-1}$  as in Fig. 5, because MG1655-derived strains are more sensitive to Nal than MDS42. Strains (i-iv): RLG14535, RLG14536, RLG14537, RLG14538. (B) Calculated percentage survival of strains on LB + Nal vs. LB alone. Graph shows mean percentage survival with one standard deviation. Statistical analysis was performed using a nonparametric two-tailed Mann-Whitney test, comparing combined data for RNAP 2+ vs. RNAP 2- mutants.  $**p < 0.01$ ,  $n = 5$ . Standard deviation value higher than the mean value results in negative error bars crossing the x-axis when the y-axis is in logarithmic scale. (C) Calculated percentage survival of strains on LB + Nal vs. LB alone. Graph shows mean with standard deviation, for Nal concentration 2, 2.5,  $3 \mu\text{g ml}^{-1}$ ,  $n = 6, 6, 7$  for WT;  $n = 4, 4, 3$  for  $\Delta dksA$  and  $n = 4, 4, 5$  for  $\Delta relA$  and  $\Delta relA \Delta spoT$ . Strains as in Fig. 5C (i-iv): MG1655, KM773, RLG850, RLG847. (D) Confirmation of  $\Delta relA$  and ppGpp<sup>0</sup> phenotypes. Strains used are the same as in Fig. 5C (i-iii): MG1655, RLG850, RLG847. Strain (iv) is RLG14538.

### Figure S3

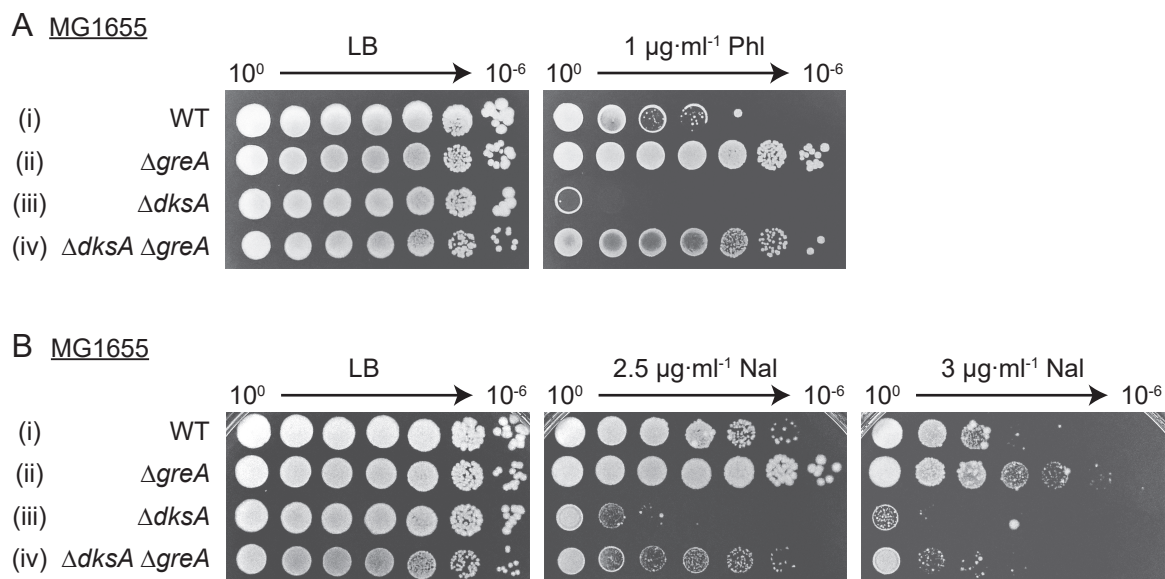

**Fig. S3. Deletion of *greA* suppresses the sensitivity of a *ΔdksA* mutant to phleomycin (A) but not to nalidixic acid (B).** Strains used are the same as in Fig. 8 (i-iv): MG1655, KM1034, KM773, KM1054.

### Figure S4

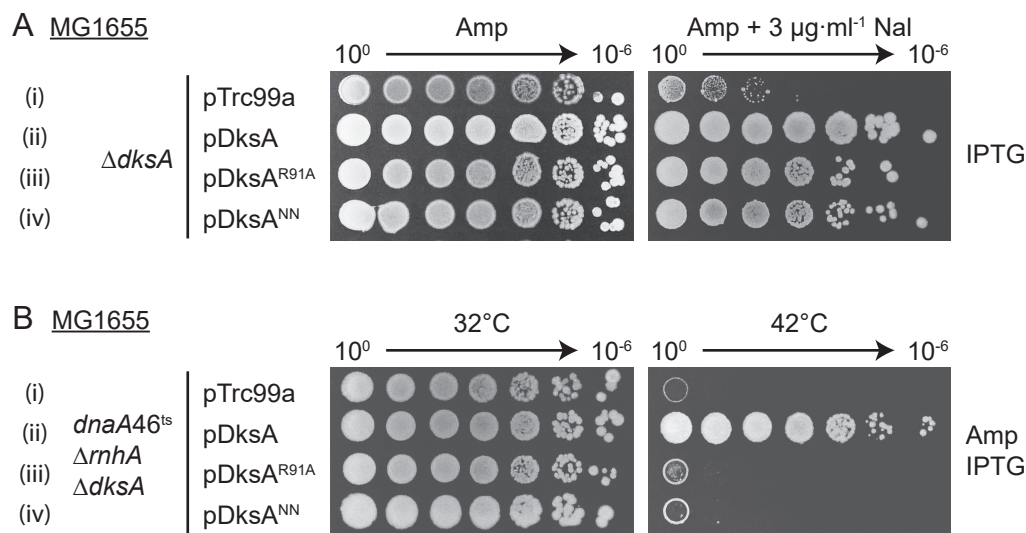

**Fig. S4. DksA coiled-coil mutant proteins are able to support the repair of nalidixic acid-induced DNA damage (A) but not cSDR (B).** As Fig. 11 but in the MG1655 background. Wild-type DksA protein and the DksA<sup>R91A</sup> and DksA<sup>NN</sup> mutants were expressed from a pTrc99a plasmids using 1 mM IPTG. Strains used: (A) KM773, (B) KM1064.



Table S1. Strains used in this study

| Strain | Genotype                                                                                                                                                                    | Construction / Source                                                        |
|--------|-----------------------------------------------------------------------------------------------------------------------------------------------------------------------------|------------------------------------------------------------------------------|
| 10562  | MDS42 $\Delta$ rnhA::cat                                                                                                                                                    | MDS42 x P1.PH379                                                             |
| 10583  | MDS42 dnaA46 <sup>ts</sup> ma::Tn10                                                                                                                                         | MDS42 x P1.STL8297                                                           |
| 10598  | MDS42 rho15<amp>                                                                                                                                                            | MDS42 x P1.9993                                                              |
| 12334  | MDS42 dnaA46 <sup>ts</sup> ma::Tn10 $\Delta$ greA::<kan>                                                                                                                    | 10583 x P1.JW3148                                                            |
| 12336  | MDS42 dnaA46 <sup>ts</sup> ma::Tn10 $\Delta$ greB::<kan>                                                                                                                    | 10583 x P1.JW3369                                                            |
| 12478  | MDS42 $\Delta$ dksA::tet rho15<amp>                                                                                                                                         | 10598 x P1.11425                                                             |
| 12481  | MDS42 $\Delta$ dksA::<kan> rpoB <sup>D444G</sup> thiC::Tn10                                                                                                                 | KM885 x P1.JJC4490                                                           |
| KK04A  | MDS42 rpoZ <sup>WT</sup> -kanR rpoC <sup>WT</sup> -tetAR                                                                                                                    | KK01A x P1.RLG14535                                                          |
| KK05A  | MDS42 rpoZ <sup>WT</sup> -kanR rpoC <sup>N680A K681A</sup> -tetAR                                                                                                           | KK01A x P1.RLG14537                                                          |
| KK06A  | MDS42 dnaA46 <sup>ts</sup> ma::Tn10(Tet <sup>s</sup> ) rpoZ <sup>WT</sup> -kanR rpoC <sup>WT</sup> -tetAR                                                                   | KK02B x P1.RLG14535                                                          |
| KK07B  | MDS42 dnaA46 <sup>ts</sup> ma::Tn10(Tet <sup>s</sup> ) $\Delta$ rnhA::cat rpoZ <sup>WT</sup> -kanR rpoC <sup>WT</sup> -tetAR                                                | KK03A x P1.RLG14535                                                          |
| KK08A  | MDS42 dnaA46 <sup>ts</sup> ma::Tn10(Tet <sup>s</sup> ) rpoZ <sup>WT</sup> -kanR rpoC <sup>N680A K681A</sup> -tetAR                                                          | KM869 x P1.RLG14535                                                          |
| KK09A  | MDS42 dnaA46 <sup>ts</sup> ma::Tn10(Tet <sup>s</sup> ) $\Delta$ rnhA::cat rpoZ <sup>WT</sup> -kanR rpoC <sup>N680A K681A</sup> -tetAR                                       | KM871 x P1.RLG14535                                                          |
| KM554  | MDS42 dnaA46 <sup>ts</sup> ma::Tn10 $\Delta$ rnhA::cat                                                                                                                      | 10583 x P1.10562                                                             |
| KM586  | MDS42 dnaA46 <sup>ts</sup> ma::Tn10 $\Delta$ rnhA::cat $\Delta$ greA::<kan>                                                                                                 | KM554 x P1.JW3148                                                            |
| KM588  | MDS42 dnaA46 <sup>ts</sup> ma::Tn10 $\Delta$ rnhA::cat $\Delta$ greB::<kan>                                                                                                 | KM554 x P1.JW3369                                                            |
| KM644  | MDS42 dnaA46 <sup>ts</sup> ma::Tn10(Tet <sup>s</sup> )                                                                                                                      | tetR removed from 10583 using chlortetacycline and fusaric acid <sup>a</sup> |
| KM650  | MDS42 dnaA46 <sup>ts</sup> ma::Tn10(Tet <sup>s</sup> ) $\Delta$ rnhA::cat                                                                                                   | tetR removed from KM554 using chlortetacycline and fusaric acid <sup>a</sup> |
| KM712  | MG1655 dnaA46 <sup>ts</sup> ma::Tn10                                                                                                                                        | MG1655 x P1.10583                                                            |
| KM727  | MG1655 dnaA46 <sup>ts</sup> ma::Tn10(Tet <sup>s</sup> )                                                                                                                     | tetR removed from KM712 using chlortetacycline and fusaric acid <sup>a</sup> |
| KM773  | MG1655 $\Delta$ dksA::<kan>                                                                                                                                                 | MG1655 x P1.JW0141                                                           |
| KM777  | MDS42 $\Delta$ rnhA::cat $\Delta$ dksA::<kan>                                                                                                                               | 10562 x P1.JW0141                                                            |
| KM801  | MDS42 dnaA46 <sup>ts</sup> ma::Tn10(Tet <sup>s</sup> ) $\Delta$ rnhA::cat rpoC <sup>E677G</sup> $\Delta$ btuB3191::Tn10 $\Delta$ yjeZ::kan                                  | KM650 x P1.CH2570                                                            |
| KM803  | MDS42 dnaA46 <sup>ts</sup> ma::Tn10(Tet <sup>s</sup> ) $\Delta$ dksA::<kan>                                                                                                 | KM644 x P1.JW0141                                                            |
| KM805  | MDS42 dnaA46 <sup>ts</sup> ma::Tn10(Tet <sup>s</sup> ) $\Delta$ dksA::tet                                                                                                   | KM644 x P1.11425                                                             |
| KM807  | MDS42 rpoC <sup>E677G</sup> $\Delta$ btuB3191::Tn10 $\Delta$ yjeZ::kan                                                                                                      | MDS42 x P1.CH2570                                                            |
| KM809  | MDS42 dnaA46 <sup>ts</sup> ma::Tn10(Tet <sup>s</sup> ) rpoC <sup>E677G</sup> $\Delta$ btuB3191::Tn10 $\Delta$ yjeZ::kan                                                     | KM644 x P1.CH2570                                                            |
| KM829  | MDS42 rpoC <sup>E677G</sup> $\Delta$ btuB3191::Tn10 $\Delta$ yjeZ::kan $\Delta$ rnhA::cat                                                                                   | KM807 x P1.10562                                                             |
| KM882  | MDS42 dnaA46 <sup>ts</sup> ma::Tn10(Tet <sup>s</sup> ) $\Delta$ rnhA::cat $\Delta$ dksA::<kan>                                                                              | KM650 x P1.JW0141                                                            |
| KM883  | MDS42 dnaA46 <sup>ts</sup> ma::Tn10(Tet <sup>s</sup> ) $\Delta$ rnhA::cat $\Delta$ dksA::tet                                                                                | KM650 x P1.11425                                                             |
| KM885  | MDS42 $\Delta$ dksA::<kan>                                                                                                                                                  | MDS42 x P1.JW0141                                                            |
| KM899  | MDS42 dnaA46 <sup>ts</sup> ma::Tn10(Tet <sup>s</sup> ) rpoZ <sup><math>\Delta</math>2-5</sup> -kanR rpoC <sup>R362A R417A K615A</sup> -tetAR                                | KM873 x P1.RLG14538                                                          |
| KM901  | MDS42 dnaA46 <sup>ts</sup> ma::Tn10(Tet <sup>s</sup> ) $\Delta$ rnhA::cat rpoZ <sup><math>\Delta</math>2-5</sup> -kanR rpoC <sup>R362A R417A K615A</sup> -tetAR             | KM875 x P1.RLG14538                                                          |
| KM911  | MDS42 dnaA46 <sup>ts</sup> ma::Tn10(Tet <sup>s</sup> ) rpoZ <sup><math>\Delta</math>2-5</sup> -kanR rpoC <sup>R362A R417A K615A N680A K681A</sup> -tetAR                    | KM877 x P1.RLG14538                                                          |
| KM913  | MDS42 dnaA46 <sup>ts</sup> ma::Tn10(Tet <sup>s</sup> ) $\Delta$ rnhA::cat rpoZ <sup><math>\Delta</math>2-5</sup> -kanR rpoC <sup>R362A R417A K615A N680A K681A</sup> -tetAR | KM879 x P1.RLG14538                                                          |
| KM915  | MDS42 rpoZ <sup><math>\Delta</math>2-5</sup> -kanR rpoC <sup>R362A R417A K615A</sup> -tetAR                                                                                 | KM888 x P1.RLG14538                                                          |
| KM917  | MDS42 rpoZ <sup><math>\Delta</math>2-5</sup> -kanR rpoC <sup>R362A R417A K615A N680A K681A</sup> -tetAR                                                                     | KM890 x P1.RLG14538                                                          |
| KM982  | MDS42 $\Delta$ greA::< $\Delta$ greB::<kan>                                                                                                                                 | KM980 x P1.JW3369                                                            |
| KM993  | MG1655 dnaA46 <sup>ts</sup> ma::Tn10(Tet <sup>s</sup> ) $\Delta$ rnhA::cat                                                                                                  | KM727 x P1.10562                                                             |
| KM1009 | MDS42 dnaA46 <sup>ts</sup> ma::Tn10(Tet <sup>s</sup> ) rpoB <sup>D444G</sup> thiC::Tn10                                                                                     | KM644 x P1.12481                                                             |
| KM1011 | MDS42 dnaA46 <sup>ts</sup> ma::Tn10(Tet <sup>s</sup> ) $\Delta$ rnhA::cat rpoB <sup>D444G</sup> thiC::Tn10                                                                  | KM650 x P1.12481                                                             |
| KM1013 | MDS42 dnaA46 <sup>ts</sup> ma::Tn10(Tet <sup>s</sup> ) rpoB <sup>D444G</sup> thiC::Tn10 $\Delta$ dksA::<kan>                                                                | KM1009 x P1.JW0141                                                           |

| Strain | Genotype                                                                                                                  | Construction / Source                             |
|--------|---------------------------------------------------------------------------------------------------------------------------|---------------------------------------------------|
| KM1017 | MDS42 <i>dnaA46<sup>ts</sup> tna::Tn10(Tet<sup>s</sup>) ΔrnhA::cat rpoB<sup>D444G</sup> thiC::Tn10 ΔdksA::&lt;kan&gt;</i> | KM1011 x P1.JW0141                                |
| KM1019 | MDS42 <i>dnaA46<sup>ts</sup> tna::Tn10 ΔgreA::&lt;ΔgreB::&lt;kan&gt;</i>                                                  | KM982 x P1.10583                                  |
| KM1021 | MDS42 <i>dnaA46<sup>ts</sup> tna::Tn10 ΔrnhA::cat ΔgreA::&lt;ΔgreB::&lt;kan&gt;</i>                                       | KM923 x P1.JW3369                                 |
| KM1034 | MG1655 <i>ΔgreA::&lt;ΔdksA::&lt;kan&gt;</i>                                                                               | kanR removed from KM1027 using pCP20 <sup>b</sup> |
| KM1047 | MDS42 <i>rpoB<sup>D444G</sup> thiC::Tn10</i>                                                                              | MDS42 x P1.12481                                  |
| KM1054 | MG1655 <i>ΔgreA::&lt;ΔdksA::&lt;kan&gt;</i>                                                                               | KM1034 x P1.JW0141                                |
| KM1058 | MG1655 <i>dnaA46<sup>ts</sup> tna::Tn10(Tet<sup>s</sup>) ΔgreA::&lt;kan&gt;</i>                                           | KM727 x P1.JW3148                                 |
| KM1060 | MG1655 <i>dnaA46<sup>ts</sup> tna::Tn10(Tet<sup>s</sup>) ΔdksA::tet</i>                                                   | KM727 x P1.11425                                  |
| KM1062 | MG1655 <i>dnaA46<sup>ts</sup> tna::Tn10(Tet<sup>s</sup>) ΔrnhA::cat ΔgreA::&lt;kan&gt;</i>                                | KM993 x P1.JW3148                                 |
| KM1064 | MG1655 <i>dnaA46<sup>ts</sup> tna::Tn10(Tet<sup>s</sup>) ΔrnhA::cat ΔdksA::tet</i>                                        | KM993 x P1.11425                                  |
| KM1066 | MG1655 <i>dnaA46<sup>ts</sup> tna::Tn10(Tet<sup>s</sup>) ΔgreA::&lt;kan&gt; ΔdksA::tet</i>                                | KM1058 x P1.11425                                 |
| KM1068 | MG1655 <i>dnaA46<sup>ts</sup> tna::Tn10(Tet<sup>s</sup>) ΔrnhA::cat ΔgreA::&lt;kan&gt; ΔdksA::tet</i>                     | KM1062 x P1.11425                                 |
| KM1136 | MG1655 <i>dnaA46<sup>ts</sup> tna::Tn10 ΔrelA251::kan</i>                                                                 | RLG850 x P1.10583                                 |
| KM1137 | MG1655 <i>dnaA46<sup>ts</sup> tna::Tn10 ΔrelA251::kan ΔspoT207::cat</i>                                                   | RLG847 x P1.10583                                 |
| KM1171 | MG1655 <i>dnaA46<sup>ts</sup> tna::Tn10 ΔrnhA::&lt;ΔrelA251::kan</i>                                                      | KM716 x P1.10583                                  |
| KM1173 | MG1655 <i>dnaA46<sup>ts</sup> tna::Tn10 ΔrnhA::&lt;ΔrelA251::kan</i>                                                      | KM1171 x P1.RLG847                                |
| KM1236 | MG1655 <i>dnaA46<sup>ts</sup> tna::Tn10 ΔrnhA::&lt;ΔrelA251::kan ΔspoT207::cat</i>                                        | KM1173 x P1.RLG847                                |
| MDS42  | MG1655 deleted for ~14% of the genome                                                                                     | (Posfai <i>et al.</i> , 2006)                     |
| MG1655 | F- <i>λ- ilvG- rfb-50 rph-1</i>                                                                                           | R. Lloyd laboratory                               |
| RLG847 | (= CF1693) MG1655 <i>ΔrelA251::kan ΔspoT207::cat</i>                                                                      | (Xiao <i>et al.</i> , 1991)                       |
| RLG850 | (= CF1651) MG1655 <i>ΔrelA251::kan</i>                                                                                    | (Metzger <i>et al.</i> , 1989)                    |
| RSW764 | MDS42 <i>ΔrnhA::cat ΔoriC::tet</i>                                                                                        | recombineering into RSW763                        |

<sup>a</sup> (Bochner *et al.*, 1980); <sup>b</sup> (Cherepanov and Wackernagel, 1995)

Table S2. Plasmids used in this study

| Plasmid              | Description                                                                                                | Source                          |
|----------------------|------------------------------------------------------------------------------------------------------------|---------------------------------|
| pASKA                | = pCA24N, P <sub>T5-lac</sub> , <i>lacI<sup>q</sup></i> , Cm <sup>R</sup>                                  | (Kitagawa <i>et al.</i> , 2005) |
| pDksA(ASKA)          | = pCA24N-JW0141 (with <i>dksA</i> )                                                                        | (Kitagawa <i>et al.</i> , 2005) |
| pGreA(ASKA)          | = pCA24N-JW3148 (with <i>greA</i> )                                                                        | (Kitagawa <i>et al.</i> , 2005) |
| pGreB(ASKA)          | = pCA24N-JW3369 (with <i>greB</i> )                                                                        | (Kitagawa <i>et al.</i> , 2005) |
| pRLG6332             | Complementation vector derived from pINI3IAI, P <sub>lpp</sub> and P <sub>lac</sub> , Amp <sup>R</sup>     | (Masui <i>et al.</i> , 1984)    |
| pRLG6333             | pRLG6332 with <i>dksA</i>                                                                                  | (Paul <i>et al.</i> , 2004)     |
| pTrc99a              | P <sub>trc</sub> vector, <i>lacI<sup>q</sup></i> , pUC18 EcoRI-HindIII polylinker region, Amp <sup>R</sup> | (Amann <i>et al.</i> , 1988)    |
| pDksA                | = pTRC-DksA-NPH, pTrc99a carrying <i>dksA</i> with N-terminal 6×His and PKA tags                           | (Parshin <i>et al.</i> , 2015)  |
| pDksA <sup>R91</sup> | = pTRC-AP53, pTRC-DksA-NPH with <i>dksA</i> <sup>R91A</sup>                                                | (Parshin <i>et al.</i> , 2015)  |
| pDksA <sup>NN</sup>  | pTRC-DksA-NPH with <i>dksA</i> <sup>D71N D74N</sup>                                                        | S. Borukhov laboratory          |

Table S3. Strains used in supplementary figures

| Strain | Genotype                                                                                                                                            | Construction / Source |
|--------|-----------------------------------------------------------------------------------------------------------------------------------------------------|-----------------------|
| KM699  | MDS42 <i>dnaA46<sup>ts</sup> tna::Tn10 ΔrelA251::kan</i>                                                                                            | 10583 x P1.RLG850     |
| KM705  | MDS42 <i>dnaA46<sup>ts</sup> tna::Tn10 ΔrnhA::cat ΔrelA251::kan</i>                                                                                 | KM554 x P1.RLG850     |
| KM1120 | MG1655 <i>dnaA46<sup>ts</sup> tna::Tn10(Tet<sup>s</sup>) ΔrnhA::cat rpoZ<sup>WT</sup>-kanR rpoC<sup>WT</sup>-tetAR</i>                              | KM1116 x P1.RLG14535  |
| KM1153 | MG1655 <i>dnaA46<sup>ts</sup> tna::Tn10(Tet<sup>s</sup>) ΔrnhA::cat rpoZ<sup>Δ2-5</sup>-kanR rpoC<sup>R362A R417A K615A</sup>-tetAR</i>             | KM1149 x P1.RSW863    |
| KM1155 | MG1655 <i>dnaA46<sup>ts</sup> tna::Tn10(Tet<sup>s</sup>) ΔrnhA::cat rpoZ<sup>Δ2-5</sup>-kanR rpoC<sup>R362A R417A K615A N680A K681A</sup>-tetAR</i> | KM1151 x P1.RSW863    |

| Strain   | Genotype                                                                                                                        | Construction / Source       |
|----------|---------------------------------------------------------------------------------------------------------------------------------|-----------------------------|
| KM1165   | MG1655 <i>dnaA46<sup>ts</sup> tna::Tn10(Tet<sup>s</sup>) ΔrnhA::cat rpoZ<sup>WT</sup>-kanR rpoC<sup>N680A K681A</sup>-tetAR</i> | KM1126 x P1.RSW863          |
| RLG14535 | MG1655 <i>rpoZ<sup>WT</sup>-kanR rpoC<sup>WT</sup>-tetAR (1+2+)</i>                                                             | (Ross <i>et al.</i> , 2016) |
| RLG14536 | MG1655 <i>rpoZ<sup>Δ2-5</sup>-kanR rpoC<sup>R362A R417A K615A</sup>-tetAR (1-2+)</i>                                            | (Ross <i>et al.</i> , 2016) |
| RLG14537 | MG1655 <i>rpoZ<sup>WT</sup>-kanR rpoC<sup>N680A K681A</sup>-tetAR (1+2-)</i>                                                    | (Ross <i>et al.</i> , 2016) |
| RLG14538 | MG1655 <i>rpoZ<sup>Δ2-5</sup>-kanR rpoC<sup>R362A R417A K615A N680A K681A</sup>-tetAR (1-2-)</i>                                | (Ross <i>et al.</i> , 2016) |

Table S4. Strains used for construction

| Strain  | Genotype                                                                                                                                 | Construction / Source                             |
|---------|------------------------------------------------------------------------------------------------------------------------------------------|---------------------------------------------------|
| 9993    | HME57 <i>rho15&lt;amp&gt;</i>                                                                                                            | D. Court laboratory                               |
| 11105   | MDS42 <i>ΔgreA::&lt;kan&gt;</i>                                                                                                          | MDS42 x P1.JW3148                                 |
| 11425   | MDS42 <i>dksA::tet</i>                                                                                                                   | MDS42 x P1.RLG7238                                |
| CH2570  | <i>lacZ-U118 ΔyjaZ::kan ΔbtuB3191::Tn10 rpoC<sup>E677G</sup></i>                                                                         | (Satory <i>et al.</i> , 2013)                     |
| JJC4490 | JJC40 <i>rpoB<sup>D444G</sup> thiC::Tn10</i>                                                                                             | (Baharoglu <i>et al.</i> , 2010)                  |
| JW0141  | F- <i>Δ(araD-araB)567 ΔdksA761::kan ΔlacZ4787(::rrnB-3) λ<sup>-</sup> rph-1 Δ(rhaD-rhaB)568 hsdR514</i>                                  | (Baba <i>et al.</i> , 2006)                       |
| JW0204  | F- <i>Δ(araD-araB)567 ΔrnhA733::kan ΔlacZ4787(::rrnB-3) λ<sup>-</sup> rph-1 Δ(rhaD-rhaB)568 hsdR514</i>                                  | (Baba <i>et al.</i> , 2006)                       |
| JW3148  | F- <i>Δ(araD-araB)567 ΔlacZ4787(::rrnB-3) λ<sup>-</sup> ΔgreA788::kan rph-1 Δ(rhaD-rhaB)568 hsdR514</i>                                  | (Baba <i>et al.</i> , 2006)                       |
| JW3369  | F- <i>Δ(araD-araB)567 ΔlacZ4787(::rrnB-3) λ<sup>-</sup> ΔgreB740::kan rph-1 Δ(rhaD-rhaB)568 hsdR514</i>                                  | (Baba <i>et al.</i> , 2006)                       |
| KK01A   | MDS42 <i>rpoZ<sup>WT</sup>-kanR</i>                                                                                                      | MDS42 x P1.RLG14535                               |
| KK02B   | MDS42 <i>dnaA46<sup>ts</sup> tna::Tn10(Tet<sup>s</sup>) rpoZ<sup>WT</sup>-kanR</i>                                                       | KM644 x P1.RLG14535                               |
| KK03A   | MDS42 <i>dnaA46<sup>ts</sup> tna::Tn10(Tet<sup>s</sup>) ΔrnhA::cat rpoZ<sup>WT</sup>-kanR</i>                                            | KM650 x P1.RLG14535                               |
| KM716   | MG1655 <i>ΔrnhA::&lt;&gt;</i>                                                                                                            | kanR removed from RSW899 using pCP20 <sup>b</sup> |
| KM869   | MDS42 <i>dnaA46<sup>ts</sup> tna::Tn10(Tet<sup>s</sup>) rpoC<sup>N680A K681A</sup>-tetAR</i>                                             | KM644 x P1.RLG14537                               |
| KM871   | MDS42 <i>dnaA46<sup>ts</sup> tna::Tn10(Tet<sup>s</sup>) ΔrnhA::cat rpoC<sup>N680A K681A</sup>-tetAR</i>                                  | KM650 x P1.RLG14537                               |
| KM873   | MDS42 <i>dnaA46<sup>ts</sup> tna::Tn10(Tet<sup>s</sup>) rpoC<sup>R362A R417A K615A</sup>-tetAR</i>                                       | KM644 x P1.RLG14536                               |
| KM875   | MDS42 <i>dnaA46<sup>ts</sup> tna::Tn10(Tet<sup>s</sup>) ΔrnhA::cat rpoC<sup>R362A R417A K615A</sup>-tetAR</i>                            | KM650 x P1.RLG14536                               |
| KM877   | MDS42 <i>dnaA46<sup>ts</sup> tna::Tn10(Tet<sup>s</sup>) rpoC<sup>R362A R417A K615A N680A K681A</sup>-tetAR</i>                           | KM644 x P1.RLG14538                               |
| KM879   | MDS42 <i>dnaA46<sup>ts</sup> tna::Tn10(Tet<sup>s</sup>) ΔrnhA::cat rpoC<sup>R362A R417A K615A N680A K681A</sup>-tetAR</i>                | KM650 x P1.RLG14538                               |
| KM888   | MDS42 <i>rpoC<sup>R362A R417A K615A</sup>-tetAR</i>                                                                                      | MDS42 x P1.RLG14536                               |
| KM890   | MDS42 <i>rpoC<sup>R362A R417A K615A N680A K681A</sup>-tetAR</i>                                                                          | MDS42 x P1.RLG14538                               |
| KM923   | MDS42 <i>dnaA46<sup>ts</sup> tna::Tn10 ΔrnhA::cat ΔgreA::&lt;&gt;</i>                                                                    | kanR removed from KM586 using pCP20 <sup>b</sup>  |
| KM980   | MDS42 <i>ΔgreA::&lt;&gt;</i>                                                                                                             | kanR removed from 11105 using pCP20 <sup>b</sup>  |
| KM1027  | MG1655 <i>ΔgreA::&lt;kan&gt;</i>                                                                                                         | MG1655 x P1.JW3148                                |
| KM1114  | MG1655 <i>dnaA46<sup>ts</sup> tna::Tn10(Tet<sup>s</sup>) rpoZ<sup>WT</sup>-kanR</i>                                                      | KM727 x P1.RLG14535                               |
| KM1116  | MG1655 <i>dnaA46<sup>ts</sup> tna::Tn10(Tet<sup>s</sup>) ΔrnhA::cat rpoZ<sup>WT</sup>-kanR</i>                                           | KM993 x P1.RLG14535                               |
| KM1122  | MG1655 <i>dnaA46<sup>ts</sup> tna::Tn10(Tet<sup>s</sup>) rpoZ<sup>Δ2-5</sup>-kanR</i>                                                    | KM727 x P1.RLG14536                               |
| KM1126  | MG1655 <i>dnaA46<sup>ts</sup> tna::Tn10(Tet<sup>s</sup>) rpoZ<sup>WT</sup>-kanR rpoC<sup>N680A K681A</sup>-tetAR</i>                     | KM1114 x P1.RLG14537                              |
| KM1149  | MG1655 <i>dnaA46<sup>ts</sup> tna::Tn10(Tet<sup>s</sup>) rpoZ<sup>Δ2-5</sup>-kanR rpoC<sup>R362A R417A K615A</sup>-tetAR</i>             | KM1122 x P1.RLG14536                              |
| KM1151  | MG1655 <i>dnaA46<sup>ts</sup> tna::Tn10(Tet<sup>s</sup>) rpoZ<sup>Δ2-5</sup>-kanR rpoC<sup>R362A R417A K615A N680A K681A</sup>-tetAR</i> | KM1122 x P1.RLG14538                              |
| PH379   | RFM430 <i>rnhA::cat</i>                                                                                                                  | (Usongo <i>et al.</i> , 2008)                     |
| RLG7238 | RLG5950 <i>dksA::tet</i>                                                                                                                 | (Rutherford <i>et al.</i> , 2007)                 |
| RSW763  | MDS42 <i>ΔrnhA::cat pSIM6</i>                                                                                                            | MDS42 pSIM6 x P1.PH379                            |
| RSW863  | MG1655 <i>ΔrnhA::cat</i>                                                                                                                 | MG1655 x P1.PH379                                 |

| Strain  | Genotype                      | Construction / Source       |
|---------|-------------------------------|-----------------------------|
| RSW899  | MG1655 $\Delta$ rnhA::<kan>   | MG1655 x P1.JW0204          |
| STL8297 | dnaA46 <sup>ts</sup> ma::Tn10 | (Foti <i>et al.</i> , 2005) |

<sup>b</sup> (Cherepanov and Wackernagel, 1995)

## SUPPLEMENTARY REFERENCES

- Amann, E., Ochs, B. and Abel, K.J., (1988) Tightly regulated *tac* promoter vectors useful for the expression of unfused and fused proteins in *Escherichia coli*. *Gene* **69**: 301-315.
- Baba, T., Ara, T., Hasegawa, M., Takai, Y., Okumura, Y., Baba, M., Datsenko, K.A., Tomita, M., Wanner, B.L. and Mori, H., (2006) Construction of *Escherichia coli* K-12 in-frame, single-gene knockout mutants: the Keio collection. *Mol Syst Biol* **2**: 2006 0008.
- Baharoglu, Z., Lestini, R., Duigou, S. and Michel, B., (2010) RNA polymerase mutations that facilitate replication progression in the *rep uvrD recF* mutant lacking two accessory replicative helicases. *Mol Microbiol* **77**: 324-336.
- Bochner, B.R., Huang, H.C., Schieven, G.L. and Ames, B.N., (1980) Positive selection for loss of tetracycline resistance. *J Bacteriol* **143**: 926-933.
- Cherepanov, P.P. and Wackernagel, W., (1995) Gene disruption in *Escherichia coli*: Tc<sup>R</sup> and Km<sup>R</sup> cassettes with the option of Flp-catalyzed excision of the antibiotic-resistance determinant. *Gene* **158**: 9-14.
- Foti, J.J., Schienda, J., Sutera, V.A., Jr. and Lovett, S.T., (2005) A bacterial G protein-mediated response to replication arrest. *Mol Cell* **17**: 549-560.
- Kitagawa, M., Ara, T., Arifuzzaman, M., Ioka-Nakamichi, T., Inamoto, E., Toyonaga, H. and Mori, H., (2005) Complete set of ORF clones of *Escherichia coli* ASKA library (A complete Set of *E. coli* K-12 ORF Archive): unique resources for biological research. *DNA Res* **12**: 291-299.
- Masui, Y., Mizuno, T. and Nouye, M., (1984) Novel high-level expression cloning vehicles: 10<sup>4</sup>-fold amplification of *Escherichia coli* minor protein. *Bio-Technol* **2**: 81-85.
- Metzger, S., Schreiber, G., Aizenman, E., Cashel, M. and Glaser, G., (1989) Characterization of the *relA1* mutation and a comparison of *relA1* with new *relA* null alleles in *Escherichia coli*. *J Biol Chem* **264**: 21146-21152.
- Parshin, A., Shiver, A.L., Lee, J., Ozerova, M., Schneidman-Duhovny, D., Gross, C.A. and Borukhov, S., (2015) DksA regulates RNA polymerase in *Escherichia coli* through a network of interactions in the secondary channel that includes Sequence Insertion 1. *Proc Natl Acad Sci U S A* **112**: E6862-6871.
- Paul, B.J., Barker, M.M., Ross, W., Schneider, D.A., Webb, C., Foster, J.W. and Gourse, R.L., (2004) DksA: a critical component of the transcription initiation machinery that potentiates the regulation of rRNA promoters by ppGpp and the initiating NTP. *Cell* **118**: 311-322.
- Posfai, G., Plunkett, G., 3rd, Feher, T., Frisch, D., Keil, G.M., Umenhoffer, K., Kolisnychenko, V., Stahl, B., Sharma, S.S., de Arruda, M., Burland, V., Harcum, S.W. and Blattner, F.R., (2006) Emergent properties of reduced-genome *Escherichia coli*. *Science* **312**: 1044-1046.

- Ross, W., Sanchez-Vazquez, P., Chen, A.Y., Lee, J.H., Burgos, H.L. and Gourse, R.L., (2016) ppGpp binding to a site at the RNAP-DksA interface accounts for its dramatic effects on transcription initiation during the stringent response. *Mol Cell* **62**: 811-823.
- Rutherford, S.T., Lemke, J.J., Vrentas, C.E., Gaal, T., Ross, W. and Gourse, R.L., (2007) Effects of DksA, GreA, and GreB on transcription initiation: insights into the mechanisms of factors that bind in the secondary channel of RNA polymerase. *J Mol Biol* **366**: 1243-1257.
- Satory, D., Halliday, J.A., Sivaramakrishnan, P., Lua, R.C. and Herman, C., (2013) Characterization of a novel RNA polymerase mutant that alters DksA activity. *J Bacteriol* **195**: 4187-4194.
- Usongo, V., Nolent, F., Sanscartier, P., Tanguay, C., Broccoli, S., Baaklini, I., Drlica, K. and Drolet, M., (2008) Depletion of RNase HI activity in *Escherichia coli* lacking DNA topoisomerase I leads to defects in DNA supercoiling and segregation. *Mol Microbiol* **69**: 968-981.
- Xiao, H., Kalman, M., Ikehara, K., Zemel, S., Glaser, G. and Cashel, M., (1991) Residual guanosine 3',5'-bispyrophosphate synthetic activity of *relA* null mutants can be eliminated by *spoT* null mutations. *J Biol Chem* **266**: 5980-5990.
